# Supplementary material
Source: PubMed Central journal article supplement (PMC6197488)
Supplement: NIHMS1504936-supplement-8.pdf [file NIHMS1504936-supplement-8.pdf]

| Sex | Age | Handedness | Age at epilepsy onset | Diagnosis                                                                   | Seizure frequency (per month) | Antiepileptic drugs (pre-surgery) | Brain region |
|-----|-----|------------|-----------------------|-----------------------------------------------------------------------------|-------------------------------|-----------------------------------|--------------|
| M   | 26  | R          | 21                    | Hippocampal Sclerosis and low-grade neuronal lesion                         | 0.5 - 1                       | LEV, LTG, CBZ                     | R ATL        |
| M   | 37  | R          | 1                     | Hippocampal Sclerosis                                                       | 1-2                           | LTG, LEV, LCM                     | L ATL        |
| M   | 20  | L          | 17                    | Moderate gliosis of the end folium (CA4) and the pyramidal cell layer (CA1) | 12                            | LEV, VPA, BZD1                    | L ATL        |
| M   | 32  | R          | 29                    | Hippocampal Sclerosis                                                       | Daily                         | LCM, LTG                          | L ATL        |
| M   | 28  | R          | 13                    | Hippocampal Sclerosis                                                       | 15; at least weekly           | LEV, BZD2, OXC                    | R ATL        |
| M   | 28  | R          | 2                     | Hippocampal Sclerosis                                                       | 2-3                           | CLB, LTG                          | L ATL        |
| F   | 40  | R          | 21                    | Hippocampal Sclerosis                                                       | 4-5                           | LEV, LTG, BZD                     | R ATL        |
| F   | 42  | R          | 15                    | Hippocampal Sclerosis                                                       | 3-4                           | LEV, LTG                          | R ATL        |
| F   | 22  | R          | 16                    | Hippocampal Sclerosis                                                       | ~12                           | OXC                               | R ATL        |

**Table S1. Patient information, related to STAR Methods.**

| Channel           | Soma   | Axon    | Dendrite                                                                                                                                                  |
|-------------------|--------|---------|-----------------------------------------------------------------------------------------------------------------------------------------------------------|
| Leak              | 1.5    | 1.5     | 2.0                                                                                                                                                       |
| HCN               | 4.0    | 1.5     | $221 * (e^{3.75 * x / 450} - 1) / (e^{3.75} - 1) + 4$ for $x < 450$<br>225 for $x \geq 450$                                                               |
| K <sub>M</sub>    | 0.08   | 133.22  | 17.0                                                                                                                                                      |
| K <sub>P</sub>    | -      | 1888.51 | $325 * (e^{-16 * x / 550} - 1) / (e^{-16} - 1) + 375$                                                                                                     |
| K <sub>T</sub>    | -      | 772.74  | 1150.0                                                                                                                                                    |
| Na <sub>P</sub>   | -      | 58.35   | -                                                                                                                                                         |
| Na <sub>T</sub>   | 3500.0 | 38961.8 | $165 + 1335 * (e^{-15 * x / 500} - e^{-15}) / (1 - e^{-15})$ for $x < 500$<br>165 for $500 \leq x < 575$<br>$165 * (1 - (x - 575) / 225)$ for $x > 575$   |
| K <sub>V3.1</sub> | 3380.3 | 3737.99 | -                                                                                                                                                         |
| SK                | 996.5  | 0.47    | 0.02                                                                                                                                                      |
| Ca <sub>LVA</sub> | 5.57   | 8.13    | 15.57                                                                                                                                                     |
| Ca <sub>HVA</sub> | 6.44   | 2.22    | $127.5 * x / 150 + 50$ for $x \leq 150$<br>177.5 for $150 < x \leq 650$<br>$127.5 * (1 - (x - 650) / 50) + 50$ for $650 < x \leq 700$<br>50 for $x > 700$ |

**Table S2. Biophysical model parameters, related to Figure 7.**
